# Supplementary material for: Psychological Flexibility and Depression in Advanced CKD and Dialysis
Source: PubMed Central journal article supplement — Kidney Med. 2020 Sep 10;2(6):684–691.e1. doi: 10.1016/j.xkme.2020.07.004 (PMC7729231; doi:10.1016/j.xkme.2020.07.004), 2020-09-10
Supplement: mmc1.pdf [file mmc1.pdf]

**Table S1. Japanese version of the Acceptance and Action Questionnaire – II (AAQ-II).**

| Stem       |                                                                                                                                                          |
|------------|----------------------------------------------------------------------------------------------------------------------------------------------------------|
| Question 1 | 自分の苦しい経験や記憶は、私が大事にしている生活を送ることを困難にする。<br><br>(Original: "My painful experiences and memories make it difficult for me to live a life that I would value") |
| Question 2 | 自分の感情に恐れを感じる<br><br>(Original: "I'm afraid of my feelings")                                                                                              |
| Question 3 | 自分の悩みや感情をコントロールできないことについて心配する。<br><br>(Original: "I worry about not being able to control my worries and feelings")                                      |
| Question 4 | 自分の苦しい経験は、充実した生活を送る事の妨げとなる。<br><br>(Original: "My painful memories prevent me from having a fulfilling life")                                            |
| Question 5 | 感情は私の人生における問題の原因となる<br><br>(Original: "Emotions cause problems in my life")                                                                              |
| Question 6 | 多くの方は自分よりもうまく人生と付き合っているようである。<br><br>(Original: "It seems like most people are handling their lives better than I am")                                   |

|                               |                                                                                                                                                                                                          |
|-------------------------------|----------------------------------------------------------------------------------------------------------------------------------------------------------------------------------------------------------|
| Question 7                    | 心配することは私の成功の妨げとなる<br>(Original: "Worries get in the way of my success")                                                                                                                                  |
| Response options for Question | 全くそうではない/めったにそうではない/ほとんどそうではない/ときどきそうではない/たびたびそうではない/たいていそうではない/常にそうである<br>(Original: Never true / Very rarely true / Seldom true / Sometimes true / Frequently true / Almost Always true / Always true) |

The original English version is also provided for each item and response.

## References

Shima T, Yanagihara M, Kawai T, Kumano H. Validation of the Japanese version of the Acceptance and Action Questionnaire-II. Paper presented at: the 77th annual meeting of the Japanese Psychological Association. September 19, 2013; Sapporo, Japan (in Japanese).

Bond FW, Hayes SC, Baer RA, Carpenter KM, Guenole N, Orcutt HK, Waltz T, Zettle RD. Preliminary psychometric properties of the Acceptance and Action Questionnaire-II: A revised measure of psychological inflexibility and experiential avoidance. *Behav Ther* 2011;42:676-88.

**Table S2. Baseline characteristics of the study patients who did not exhibit depressive symptoms at baseline, stratified by completeness of follow-up.**

|                                         | Completed<br>n=191 | Not completed <sup>a</sup><br>n=98 | <u>P-value<sup>b</sup></u><br>— |
|-----------------------------------------|--------------------|------------------------------------|---------------------------------|
| <b><u>Demographics</u></b>              |                    |                                    |                                 |
| <b>Age, years<sup>c</sup></b>           | 66.9 (13.8)        | 68.4 (13.3)                        | <u>0.40</u>                     |
| <b>Women</b>                            | 54 (28 %)          | 31 (32 %)                          | <u>0.55</u>                     |
| <b>Treatment categories</b>             |                    |                                    | <u>0.31</u>                     |
| <i>Non-dialyzed</i>                     | 57 (30 %)          | 36 (37 %)                          | <u>0.13</u>                     |
| <i>Peritoneal dialysis</i>              | 36 (19 %)          | 24 (24 %)                          |                                 |
| <i>Hemodialysis</i>                     | 98 (51 %)          | 38 (39 %)                          |                                 |
| <b>Renal disease</b>                    |                    |                                    |                                 |
| <i>Diabetic nephropathy</i>             | 47 (25 %)          | 25 (26 %)                          | <u>0.94</u>                     |
| <i>Glomerulonephritis</i>               | 46 (24 %)          | 22 (22 %)                          |                                 |
| <i>Hypertensive disease</i>             | 39 (20 %)          | 18 (18 %)                          |                                 |
| <i>Others</i>                           | 59 (31 %)          | 33 (34 %)                          |                                 |
| <b>Impaired performance status, yes</b> | 12 (6 %)           | 13 (13 %)                          | <u>0.05</u>                     |
| <b>Having family, yes</b>               | 170 (89 %)         | 92 (94 %)                          | <u>0.18</u>                     |
| <b>Working, yes</b>                     | 61 (32 %)          | 33 (34 %)                          | <u>0.77</u>                     |
| <b><u>Comorbidities</u></b>             |                    |                                    |                                 |
| Coronary artery disease                 | 29 (15 %)          | 14 (14 %)                          | <u>0.84</u>                     |
| Cerebrovascular disease                 | 24 (13 %)          | 16 (16 %)                          | <u>0.38</u>                     |
| Malignancy                              | 18 (9 %)           | 11 (11 %)                          | <u>0.63</u>                     |

**Psychological measurements**

|                                     |                |                |             |
|-------------------------------------|----------------|----------------|-------------|
| <b>AAQ-II, points<sup>c,d</sup></b> | 41.6 (6.7)     | 42.0 (6.2)     | <u>0.71</u> |
|                                     | 43.0 [37 - 47] | 43.0 [37 - 48] |             |
| <b>CES-D, points<sup>c</sup></b>    | 8.8 (4.4)      | 8.4 (4.4)      | <u>0.52</u> |
|                                     | 9.0 [5 - 12]   | 9.0 [5 - 12]   |             |

---

<sup>a</sup>Patients who did not participate in the follow-up survey (n=93) and those who did not complete the CES-D questionnaire at 1 year (n=5) were included.

<sup>b</sup>P-values of unpaired t-test and Mann-Whitney test were provided for normally and non-normally distributed continuous variables, respectively. P-values of chi-squared test were provided for categorical variables.

<sup>c</sup>Values for continuous data are presented as mean (standard deviation) and/or median [interquartile range].

<sup>d</sup>Reversed AAQ-II score (i.e., higher score indicates better psychological flexibility).

AAQ-II, Acceptance and Action Questionnaire – II; CES-D, Center for Epidemiologic Studies Depression questionnaire

**Table S3. Sensitivity analysis of the association between better psychological flexibility level and incident depression (n=191).**

|                                                | Adjusted odds ratio |                    |              |
|------------------------------------------------|---------------------|--------------------|--------------|
|                                                | Point estimates     | 95% CI             | P-value      |
| <b>AAQ-II, per 5 point higher<sup>a</sup>,</b> | <b>0.63</b>         | <b>(0.48–0.83)</b> | <b>0.001</b> |
| <b>per 1 SD higher<sup>a</sup></b>             | <b>0.54</b>         | <b>(0.37–0.78)</b> |              |
| <b>Age, per year</b>                           | <b>0.96</b>         | <b>(0.93–0.99)</b> | <b>0.01</b>  |
| <b>Women vs. men</b>                           | 0.66                | (0.26–1.67)        | <u>0.38</u>  |
| <b>Diabetic nephropathy</b>                    | 1.78                | (0.79–4.03)        | <u>0.16</u>  |
| <b>Impaired performance status</b>             | 1.41                | (0.32–6.33)        | <u>0.65</u>  |

The data were fit to a penalized maximum likelihood logistic regression model, adjusted for treatment status, presence of family, working status, comorbidities, and all other variables listed in this table. One hundred ninety-one patients were included in the model.

<sup>a</sup>A higher AAQ-II score (after reversal) indicates better psychological flexibility.

Bold P-values indicate statistically significant differences.

95% CI, 95% confidence interval; SD, standard deviation; AAQ-II, Acceptance and Action Questionnaire – II.
